# Supplementary material for: Meaningful Improvement in General Health Outcomes with Guselkumab Treatment for Psoriatic Arthritis: Patient-Reported Outcomes Measurement Information System-29 Results from a Phase 3 Study
Source: PubMed Central journal article supplement — Patient. 2022 Jun 30;15(6):657–68. doi: 10.1007/s40271-022-00588-6 (PMC9584870; doi:10.1007/s40271-022-00588-6), 2022-06-30
Supplement: 40271_2022_588_MOESM1_ESM.pdf [file 40271_2022_588_MOESM1_ESM.pdf]

**Meaningful Improvement in General Health Outcomes With Guselkumab  
Treatment for Psoriatic Arthritis: Patient-Reported Outcomes Measurement  
Information System-29 Results From a Phase 3 Study**

For submission to: *The Patient*

Ana-Maria Orbai,<sup>1</sup> Laura C. Coates,<sup>2</sup> Atul Deodhar,<sup>3</sup> Philip S. Helliwell,<sup>4</sup> Christopher T. Ritchlin,<sup>5</sup> Evan Leibowitz,<sup>6</sup> Alexa P. Kollmeier,<sup>7</sup> Elizabeth C. Hsia,<sup>7,8</sup> Xie L. Xu,<sup>7</sup> Shihong Sheng,<sup>7</sup> Yusang Jiang,<sup>7,9</sup> Yan Liu,<sup>7</sup> Chenglong Han<sup>7</sup>

<sup>1</sup>Psoriatic Arthritis Program, Johns Hopkins University School of Medicine, Baltimore, MD, USA; <sup>2</sup>Nuffield Department of Orthopaedics, University of Oxford, Oxford, UK; <sup>3</sup>Division of Arthritis and Rheumatic Diseases, Oregon Health & Science University, Portland, OR, USA; <sup>4</sup>Leeds Institute of Rheumatic and Musculoskeletal Medicine, University of Leeds, Leeds, UK; <sup>5</sup>Department of Medicine, Allergy/Immunology and Rheumatology, University of Rochester Medical Center, Rochester, NY, USA; <sup>6</sup>Janssen Scientific Affairs, LLC, Horsham, PA, USA; <sup>7</sup>Janssen Research & Development, Spring House, PA/San Diego CA, USA; <sup>8</sup>University of Pennsylvania School of Medicine, Philadelphia, PA, USA; <sup>9</sup>Cytel, Inc., Chesterbrook, PA, USA

**Corresponding author:**

Ana-Maria Orbai, MD MHS

Email: [aorbai1@jhmi.edu](mailto:aorbai1@jhmi.edu)

## SUPPLEMENTARY MATERIAL

Supplementary Fig 1. Cumulative distribution of points of improvement in PROMIS-29 sleep disturbance (A), anxiety (B), and depression (C) domain T-scores from baseline to Week 24.

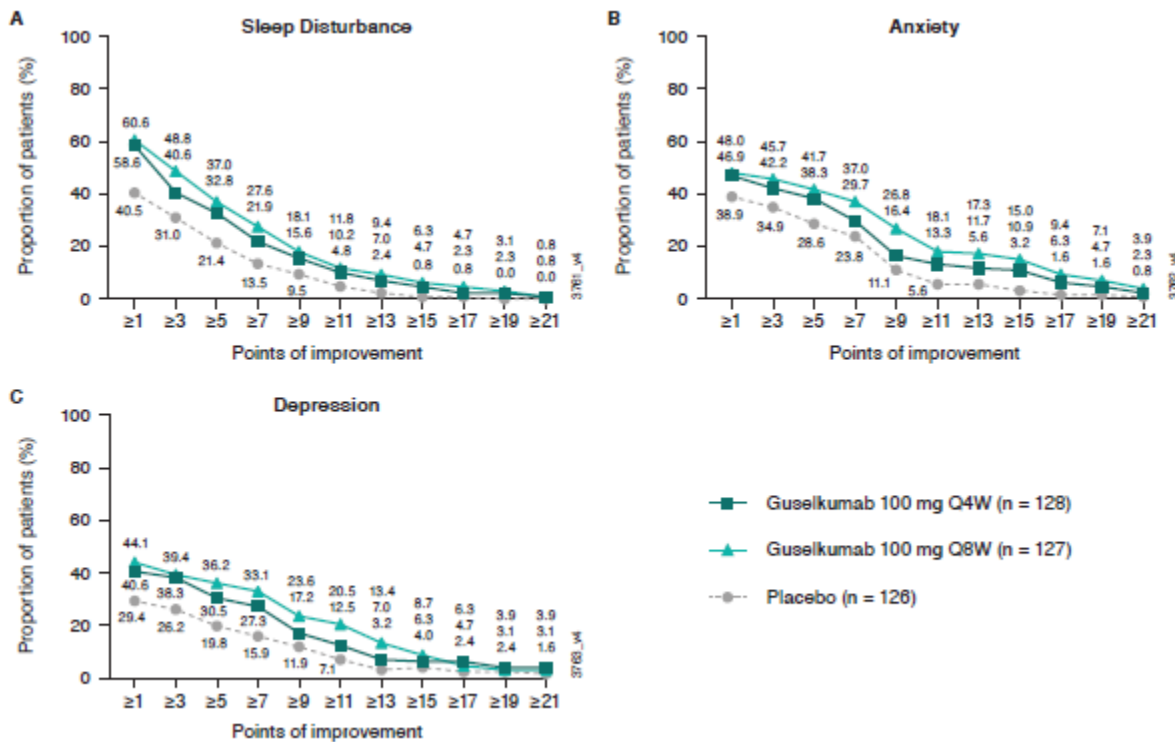

PROMIS, Patient-Reported Outcomes Measurement Information System; Q4W, every 4 weeks; Q8W, every 8 weeks.

**Supplementary Fig 2. Proportions of patients achieving  $\geq 3$ -point improvements in PROMIS-29 domain T-scores from baseline to Week 24 and Week 52 (non-responder imputation).**

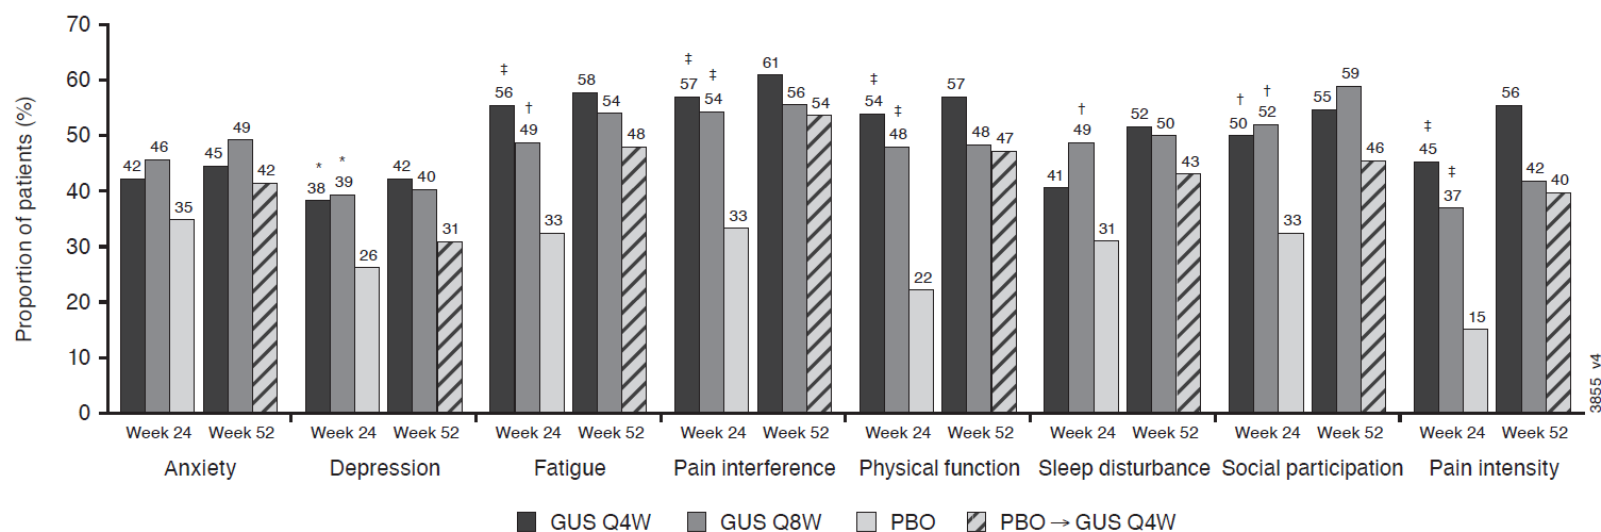

Week 24: All patients, including those with imputed data (patients meeting treatment failure prior to Week 24 or with missing data at Week 24 were considered as not achieving  $\geq 5$ -point improvement); P-values calculated using Cochran-Mantel-Haenszel test; nominal p-values vs PBO: \* $p < 0.05$ ; † $p < 0.01$ ; ‡ $p < 0.001$ . GUS Q4W, n=128; GUS Q8W, n=127; PBO, n=126.

Week 52: Evaluable patients; after discontinuation of study agent for any reason, patients with missing data were considered non-responders.

GUS, guselkumab; PBO, placebo; PROMIS, Patient-Reported Outcomes Measurement Information System; Q4W, every 4 weeks; Q8W, every 8 weeks.
